# Supplementary material for: Improving metagenomic binning results with overlapped bins using assembly graphs
Source: PubMed Central journal article supplement (PMC8097841; doi:10.1186/s13015-021-00185-6), 2021-05-04
Supplement: 13015_2021_185_MOESM1_ESM.pdf [file 13015_2021_185_MOESM1_ESM.pdf]

# Supplementary Material for "Improving Metagenomic Binning Results with Overlapped Bins Using Assembly Graphs"

## 1 Datasets

Supplementary Table 1 summarises the information on the datasets used for the experiments including read length, number of reads, number of contigs, mean contig length and the number of species identified for the ground truth. Paired-end reads were simulated for the **Sim-5G**, **Sim-10G**, **Sim-20G** and **50G-SR** datasets using the tool InSilicoSeq [2] modelling a MiSeq instrument with 300bp mean read length. The **Sharon** [7] datasets consisted of Illumina HiSeq 2000 reads with 100bp mean read length. The **Lake Water** [5] dataset consisted of Illumina MiSeq reads with 300bp mean read length. The **100G-LR** [10] dataset consisted of simulated PacBio reads with 8,000bp mean read length.

| Dataset        | Assembler  | Read length (bp) | Number of paired end reads | Total number of non-isolated contigs | Mean contig length (bp) | Number of species in ground truth |
|----------------|------------|------------------|----------------------------|--------------------------------------|-------------------------|-----------------------------------|
| Sim-5G         | metaSPAdes | 300              | 2,000,000                  | 516                                  | 51,723                  | 5                                 |
|                | SGA        | 300              | 2,000,000                  | 18,192                               | 1,675                   | 5                                 |
| Sim-10G        | metaSPAdes | 300              | 6,999,998                  | 900                                  | 47,279                  | 10                                |
|                | SGA        | 300              | 6,999,998                  | 32,389                               | 1,300                   | 10                                |
| Sim-20G        | metaSPAdes | 300              | 15,000,001                 | 1,404                                | 48,021                  | 20                                |
|                | SGA        | 300              | 15,000,001                 | 72,791                               | 873                     | 20                                |
| Sharon-1 [7]   | metaSPAdes | 100              | 14,869,863                 | 371                                  | 17,144                  | 12                                |
|                | SGA        | 100              | 14,869,863                 | 766                                  | 3,034                   | 12                                |
| Sharon-All [7] | metaSPAdes | 100              | 135,493,567                | 2,730                                | 7,689                   | 12                                |
|                | SGA        | 100              | 135,493,567                | 20,942                               | 1,547                   | 12                                |
| 50G-SR         | metaSPAdes | 300              | 20,730,313                 | 4,159                                | 37,027                  | 50                                |
| Lake Water [5] | metaSPAdes | 300              | 4,627,091                  | 96,880                               | 1,020                   | 57                                |
| 100G-LR [10]   | metaFlye   | 8,000            | 3,754,639                  | 958                                  | 2,538                   | 100                               |

Supplementary Table 1: Information on the datasets used for the experiments.

Supplementary Table 2 denotes the details about the simulated short-read datasets including the species present, their genome sizes, sequencing coverage values and abundance values.

| Dataset                             | Species present                           | Genome size | Coverage | Abundance |
|-------------------------------------|-------------------------------------------|-------------|----------|-----------|
| Sim-5G                              | <i>Acetobacter pasteurianus</i>           | 2.9 Mb      | 115×     | 28%       |
|                                     | <i>Aeromonas veronii</i>                  | 4.6 Mb      | 72×      | 28%       |
|                                     | <i>Amycolatopsis mediterranei</i>         | 10.4 Mb     | 26×      | 22%       |
|                                     | <i>Arthrobacter arilaitensis</i>          | 3.9 Mb      | 41×      | 13%       |
|                                     | <i>Azorhizobium caulinodans</i>           | 5.4 Mb      | 20×      | 9%        |
| Sim-10G                             | <i>Acetobacter pasteurianus</i>           | 2.9 Mb      | 357×     | 25%       |
|                                     | <i>Aeromonas veronii</i>                  | 4.6 Mb      | 225×     | 25%       |
|                                     | <i>Amycolatopsis mediterranei</i>         | 10.4 Mb     | 80×      | 20%       |
|                                     | <i>Arthrobacter arilaitensis</i>          | 3.9 Mb      | 128×     | 12%       |
|                                     | <i>Azorhizobium caulinodans</i>           | 5.4 Mb      | 62×      | 8%        |
|                                     | <i>Bacillus cereus</i>                    | 5.3 Mb      | 58×      | 7%        |
|                                     | <i>Bdellovibrio bacteriovorus</i>         | 3.8 Mb      | 11×      | 1%        |
|                                     | <i>Bifidobacterium adolescentis</i>       | 2.1 Mb      | 20×      | 1%        |
|                                     | <i>Brachyspira intermedia</i>             | 3.4 Mb      | 11×      | 1%        |
| <i>Campylobacter jejuni</i>         | 1.7 Mb                                    | 21×         | 1%       |           |
| Sim-20G                             | <i>Acetobacter pasteurianus</i>           | 2.9 Mb      | 705×     | 23%       |
|                                     | <i>Aeromonas veronii</i>                  | 4.6 Mb      | 445×     | 23%       |
|                                     | <i>Amycolatopsis mediterranei</i>         | 10.4 Mb     | 157×     | 18%       |
|                                     | <i>Arthrobacter arilaitensis</i>          | 3.9 Mb      | 253×     | 11%       |
|                                     | <i>Azorhizobium caulinodans</i>           | 5.4 Mb      | 123×     | 7%        |
|                                     | <i>Bacillus cereus</i>                    | 5.3 Mb      | 114×     | 7%        |
|                                     | <i>Bdellovibrio bacteriovorus</i>         | 3.8 Mb      | 22×      | 1%        |
|                                     | <i>Bifidobacterium adolescentis</i>       | 2.1 Mb      | 40×      | 1%        |
|                                     | <i>Brachyspira intermedia</i>             | 3.4 Mb      | 21×      | 1%        |
|                                     | <i>Campylobacter jejuni</i>               | 1.7 Mb      | 41×      | 1%        |
|                                     | <i>Candidatus Pelagibacter ubique</i>     | 1.3 Mb      | 54×      | 1%        |
|                                     | <i>Chlamydia trachomatis</i>              | 1.1 Mb      | 64×      | 1%        |
|                                     | <i>Clostridium acetobutylicum</i>         | 4.0 Mb      | 18×      | 1%        |
|                                     | <i>Corynebacterium diphtheriae</i>        | 2.5 Mb      | 28×      | 1%        |
|                                     | <i>Cyanobacterium UCYN</i>                | 1.5 Mb      | 47×      | 1%        |
| <i>Desulfovibrio vulgaris</i>       | 3.6 Mb                                    | 20×         | 1%       |           |
| <i>Ehrlichia ruminantium</i>        | 1.5 Mb                                    | 47×         | 1%       |           |
| <i>Enterococcus faecium</i>         | 3.0 Mb                                    | 24×         | 1%       |           |
| <i>Erysipelothrix rhusiopathiae</i> | 1.8 Mb                                    | 39×         | 1%       |           |
| <i>Escherichia coli</i>             | 5.0 Mb                                    | 14×         | 1%       |           |
| 50G-SR                              | <i>Acetobacter pasteurianus</i>           | 2.9 Mb      | 773×     | 4%        |
|                                     | <i>Aeromonas veronii</i>                  | 4.6 Mb      | 493×     | 3%        |
|                                     | <i>Amycolatopsis mediterranei</i>         | 10.4 Mb     | 175×     | 2%        |
|                                     | <i>Arthrobacter arilaitensis</i>          | 3.9 Mb      | 281×     | 2%        |
|                                     | <i>Azorhizobium caulinodans</i>           | 5.4 Mb      | 136×     | 2%        |
|                                     | <i>Bacillus cereus</i>                    | 5.3 Mb      | 126×     | 2%        |
|                                     | <i>Bacillus thuringiensis</i>             | 5.4 Mb      | 35×      | 2%        |
|                                     | <i>Bdellovibrio bacteriovorus</i>         | 3.8 Mb      | 25×      | 2%        |
|                                     | <i>Bifidobacterium adolescentis</i>       | 2.1 Mb      | 44×      | 2%        |
|                                     | <i>Bifidobacterium animalis</i>           | 2.0 Mb      | 48×      | 2%        |
|                                     | <i>Brachyspira intermedia</i>             | 3.4 Mb      | 23×      | 2%        |
|                                     | <i>Campylobacter jejuni</i>               | 1.7 Mb      | 47×      | 2%        |
|                                     | <i>Candidatus Pelagibacter ubique</i>     | 1.3 Mb      | 59×      | 2%        |
|                                     | <i>Candidatus Phytoplasma mali</i>        | 0.6 Mb      | 129×     | 2%        |
|                                     | <i>Candidatus Sulcia muelleri</i>         | 0.3 Mb      | 279×     | 2%        |
|                                     | <i>Chlamydia psittaci</i>                 | 1.2 Mb      | 66×      | 2%        |
|                                     | <i>Chlamydia trachomatis</i>              | 1.1 Mb      | 74×      | 2%        |
|                                     | <i>Clostridium acetobutylicum</i>         | 4.0 Mb      | 20×      | 2%        |
|                                     | <i>Clostridium botulinum</i>              | 2.8 Mb      | 28×      | 2%        |
|                                     | <i>Clostridium tetani</i>                 | 2.8 Mb      | 28×      | 2%        |
|                                     | <i>Clostridium thermocellum</i>           | 3.9 Mb      | 20×      | 2%        |
|                                     | <i>Corynebacterium diphtheriae</i>        | 2.5 Mb      | 31×      | 2%        |
|                                     | <i>Corynebacterium pseudotuberculosis</i> | 2.4 Mb      | 33×      | 2%        |
|                                     | <i>Corynebacterium ulcerans</i>           | 2.5 Mb      | 31×      | 2%        |
|                                     | <i>Cyanobacterium UCYN</i>                | 1.5 Mb      | 54×      | 2%        |
|                                     | <i>Cyanospora sp.</i>                     | 6.2 Mb      | 13×      | 2%        |
|                                     | <i>Desulfovibrio vulgaris</i>             | 3.6 Mb      | 22×      | 2%        |
|                                     | <i>Ehrlichia ruminantium</i>              | 1.5 Mb      | 52×      | 2%        |
|                                     | <i>Enterococcus faecium</i>               | 3.0 Mb      | 26×      | 2%        |
|                                     | <i>Erysipelothrix rhusiopathiae</i>       | 1.8 Mb      | 43×      | 2%        |
|                                     | <i>Escherichia coli</i>                   | 5.0 Mb      | 16×      | 2%        |
|                                     | <i>Fervidococcus fontis</i>               | 1.3 Mb      | 59×      | 2%        |
|                                     | <i>Fibrobacter succinogenes</i>           | 3.9 Mb      | 20×      | 2%        |
|                                     | <i>Flavobacterium branchiophilum</i>      | 3.6 Mb      | 22×      | 2%        |
|                                     | <i>Francisella novicida</i>               | 1.9 Mb      | 41×      | 2%        |
|                                     | <i>Francisella tularensis</i>             | 1.9 Mb      | 41×      | 2%        |
|                                     | <i>Fusobacterium nucleatum</i>            | 2.2 Mb      | 36×      | 2%        |
|                                     | <i>Gardnerella vaginalis</i>              | 1.8 Mb      | 45×      | 2%        |
|                                     | <i>Granulicella tundricola</i>            | 4.4 Mb      | 18×      | 2%        |
|                                     | <i>Haemophilus influenzae</i>             | 1.9 Mb      | 41×      | 2%        |
|                                     | <i>Haemophilus parainfluenzae</i>         | 2.1 Mb      | 37×      | 2%        |
|                                     | <i>Haemophilus somnus</i>                 | 2.3 Mb      | 34×      | 2%        |
| <i>Halobacterium sp. NRC-1</i>      | 2.0 Mb                                    | 38×         | 2%       |           |
| <i>Halothibacillus neapolitanus</i> | 2.6 Mb                                    | 30×         | 2%       |           |
| <i>Helicobacter pylori</i>          | 1.6 Mb                                    | 49×         | 2%       |           |
| <i>Hyphomicrobium sp. MC1</i>       | 4.9 Mb                                    | 16×         | 2%       |           |
| <i>Ignavibacterium album</i>        | 3.7 Mb                                    | 21×         | 2%       |           |
| <i>Klebsiella oxytoca</i>           | 6.1 Mb                                    | 13×         | 2%       |           |
| <i>Krokinobacter sp.</i>            | 3.4 Mb                                    | 23×         | 2%       |           |
| <i>Lactobacillus brevis</i>         | 2.3 Mb                                    | 34×         | 2%       |           |

Supplementary Table 2: Details about the simulated short-read datasets.

## 2 Commands Used

### 2.1 Assembly Tools

#### metaSPAdes

```
spades --meta -1 Reads_1.fastq -2 Reads_2.fastq -o /path/output_path -t 20
```

#### SGA

```
sga preprocess -o reads.fastq --pe-mode 1 Reads_1.fastq Reads_2.fastq
sga index -a ropebwt -t 16 --no-reverse reads.fastq
sga correct -k 41 --learn -t 16 -o reads.k41.fastq reads.fastq
sga index -a ropebwt -t 16 reads.k41.fastq
sga filter -x 2 -t 16 reads.k41.fastq
sga fm-merge -m 45 -t 16 reads.k41.filter.pass.fa
sga index -t 16 reads.k41.filter.pass.merged.fa
sga overlap -m 55 -t 16 reads.k41.filter.pass.merged.fa
sga assemble -m 95 reads.k41.filter.pass.merged.asqg.gz
```

#### metaFlye

```
flye --meta --pacbio-raw reads.fasta --genome-size estimated_metagenome_size
--out-dir /output_path --threads 16
```

### 2.2 Binning and Refinement Tools

#### CONCOCT

```
cut_up_fasta.py contigs.fasta -c 10000 -o 0 --merge_last -b contigs_10K.bed
> contigs_10K.fa
concoct_coverage_table.py contigs_10K.bed aln-pe.sorted.bam > coverage_table.tsv
concoct --composition_file contigs_10K.fa --coverage_file coverage_table.tsv -b
/output_path -t 8
merge_cutup_clustering.py /output_path/clustering_gt1000.csv > /output_path/clustering_merged.csv
extract_fasta_bins.py contigs.fasta /output_path/clustering_merged.csv --output_path
/output_path/fasta_bins
```

#### MaxBin2

```
perl MaxBin-2.2.5/run_MaxBin.pl -contig contigs.fasta -abund abundance.abund
-out /output_path
```

#### SolidBin

```
python scripts/gen_kmer.py contig.fasta 1000 4
sh gen_cov.sh
python SolidBin.py --contig_file contigs.fasta --composition_profiles kmer_4.csv
--coverage_profiles cov_inputtableR.tsv
--output /output_path/result.tsv --log /output_path/log.txt --use_sfs
```

#### GraphBin

```
./graphbin --graph assembly_graph_with_scaffolds.gfa --paths contigs.paths
--binned initial_contig_bins.csv --output /output_path --assembler spades
```

### 3 Results of SGA Assemblies

#### 3.1 Binning Results

Supplementary Figures 1, 2 and 3 demonstrate the results of CONCOCT [1], MaxBin2 [11] and SolidBin [9], respectively with GraphBin [4] and GraphBin2 on top of the initial binning results for the SGA [8] assemblies.

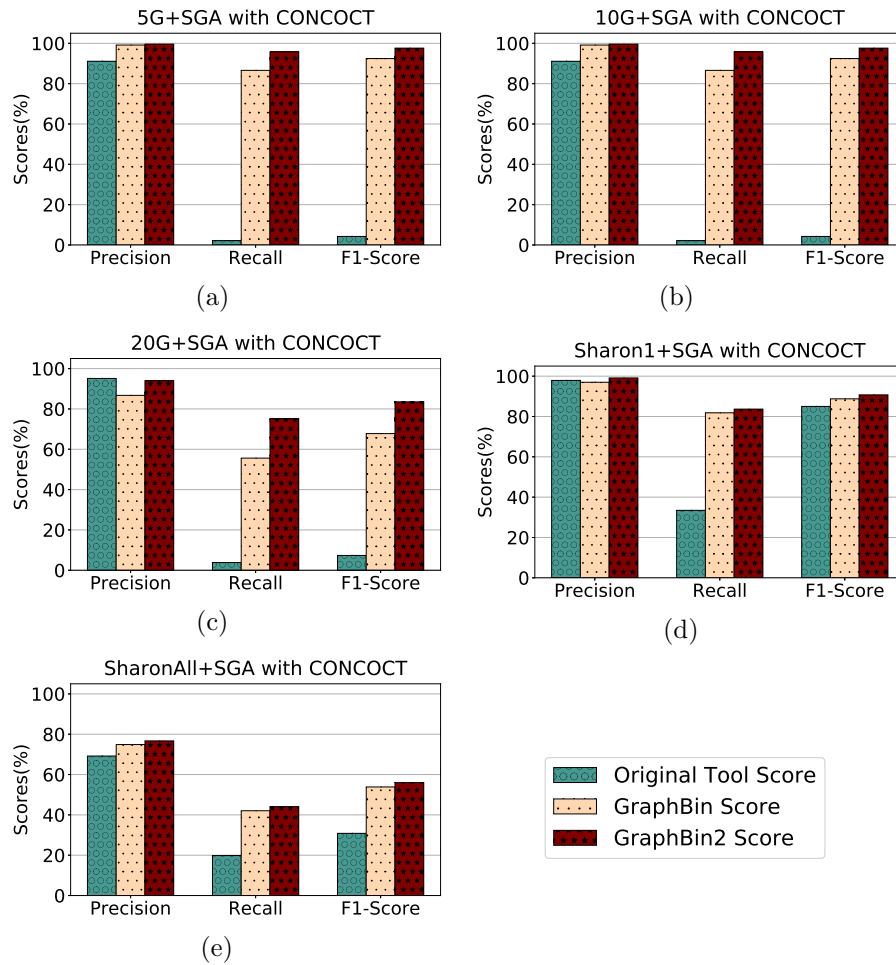

Supplementary Figure 1: Comparison of binning results of CONCOCT [1], GraphBin [4] and GraphBin2 (on top of CONCOCT results) using assembly graphs built by SGA [8].

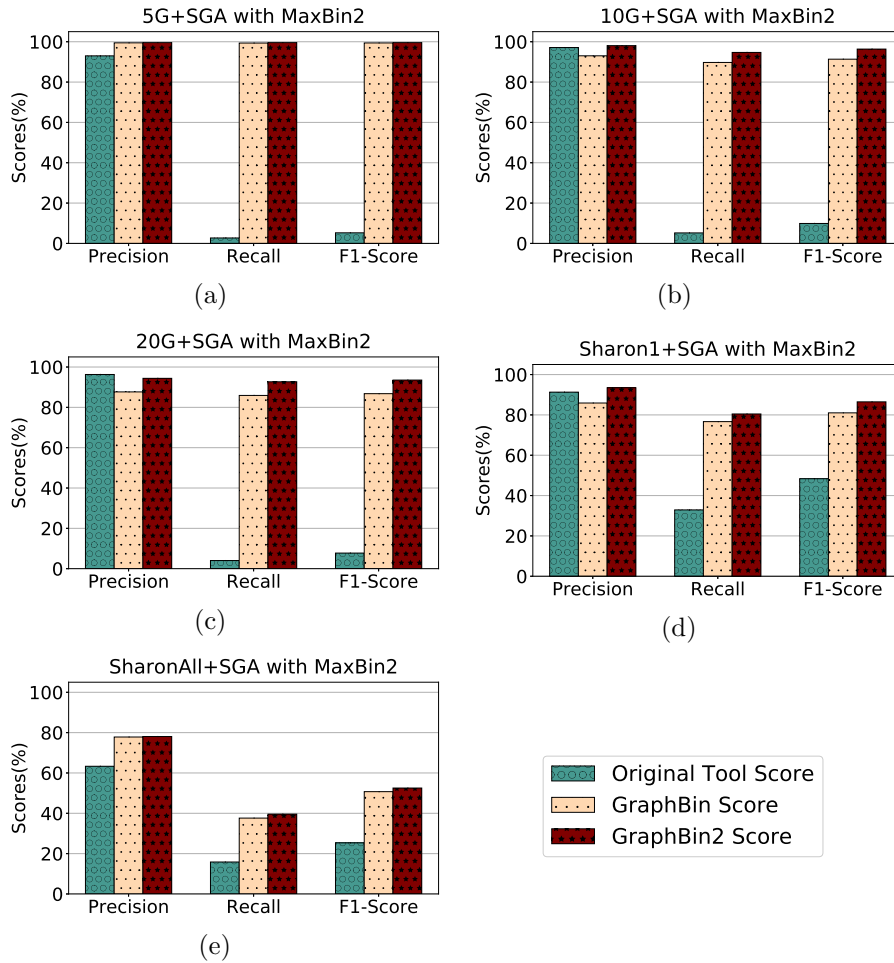

Supplementary Figure 2: Comparison of binning results of MaxBin2 [11], GraphBin [4] and GraphBin2 (on top of MaxBin2 results) using assembly graphs built by SGA [8].

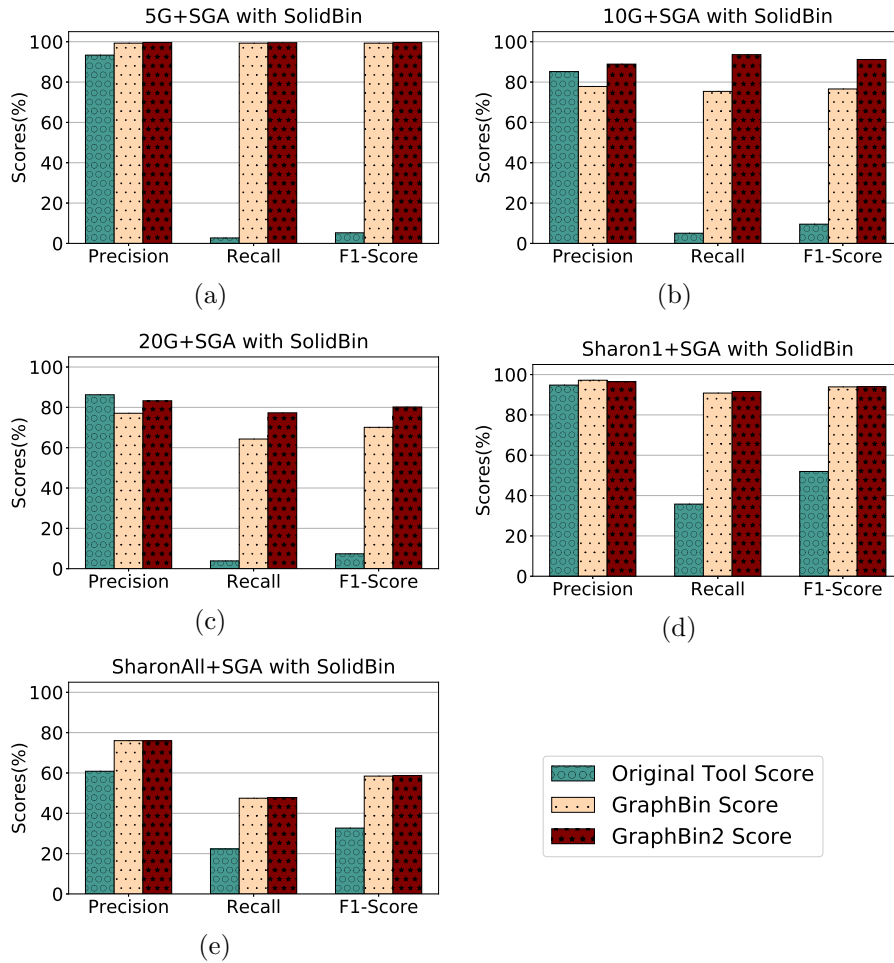

Supplementary Figure 3: Comparison of binning results of SolidBin [9], GraphBin [4] and GraphBin2 (on top of SolidBin results) using assembly graphs built by SGA [8].

### 3.2 Multi-Labelled Inference Results

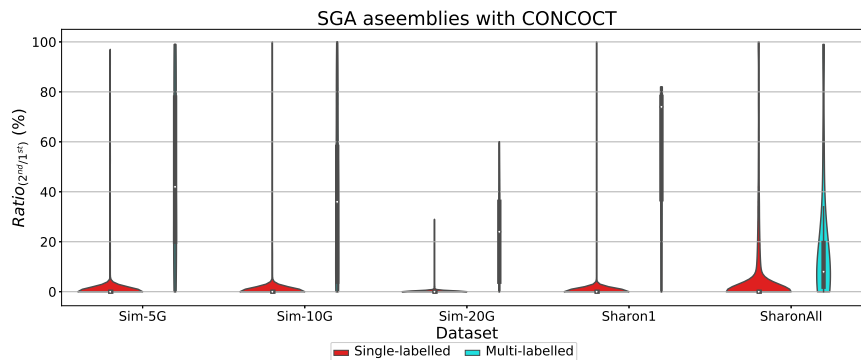

(a)

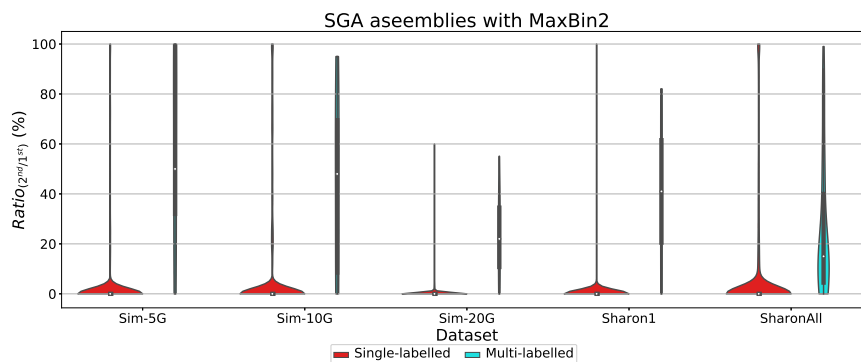

(b)

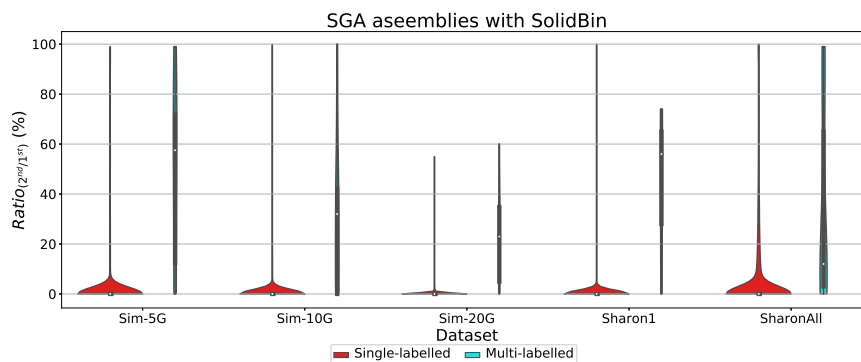

(c)

Supplementary Figure 4: Violin plots for the ratio  $Ratio_{(2^{nd}/1^{st})}$  of the single and multi-labelled inference results using GraphBin2 on top of (a) CONCOCT [1], (b) MaxBin2 [11] and (c) SolidBin [9] results for the SGA assemblies.

| Dataset   | With<br>CONCOCT result | With<br>MaxBin2 result | With<br>SolidBin result |
|-----------|------------------------|------------------------|-------------------------|
| Sim-5G    | 31                     | 6                      | 8                       |
| Sim-10G   | 81                     | 9                      | 2                       |
| Sim-20G   | 156                    | 15                     | 11                      |
| Sharon1   | 6                      | 2                      | 2                       |
| SharonAll | 40                     | 37                     | 17                      |

Supplementary Table 3: The number of multi-labelled contigs identified by GraphBin2 for the SGA [8] assemblies using the initial binning result of each binning tool.

## 4 Running Time and Memory Usage

The running times and the peak memory used by the metaSPAdes [6] and metaFlye [3] for assembly, the initial binning tools and GraphBin2 to bin all the datasets can be found in Supplementary Tables 4, 5 and 6.

| Dataset        | Assembly   | Running time<br>(CPU time) | Peak<br>memory usage |
|----------------|------------|----------------------------|----------------------|
| Sim-5G         | metaSPAdes | 2h 42m 5s                  | 7.78 GB              |
| Sim-10G        | metaSPAdes | 16h 07m 58s                | 24.60 GB             |
| Sim-20G        | metaSPAdes | 44h 54m 17s                | 54.33 GB             |
| Sharon1 [7]    | metaSPAdes | 4h 27m 29s                 | 1.66 GB              |
| SharonAll [7]  | metaSPAdes | 78h 57m 24s                | 199.93 GB            |
| 50G-SR         | metaSPAdes | 77h 30m 6s                 | 70.67 GB             |
| Lake Water [5] | metaSPAdes | 17h 21m 52s                | 51.79 GB             |
| 100G-LR [10]   | metaFlye   | 129h 21m 58s               | 299.11 GB            |

Supplementary Table 4: Running times (CPU time) and peak memory usage to assemble each dataset. *s* denotes seconds, *m* denotes minutes, *h* denotes hours and *GB* denotes gigabytes.

CONCOCT, MaxBin2 and GraphBin2 were executed with 8 threads and SolidBin was executed with a single thread. The running times for CONCOCT and SolidBin only include the times taken to run the main software, excluding the times taken to build the composition and coverage profile files.

GraphBin2 took less than 12 minutes and less than 165 MB of memory to complete executing the **Sharon-All** dataset with 8 threads. Moreover, the highest running time and memory usage has been recorded for the metaSPAdes assembly of the **LakeWater** [5] dataset as it consisted of the most complex assembly graph with the most number of contigs.



| Dataset | Assembly   | Tool                    | Running time | Peak memory usage |
|---------|------------|-------------------------|--------------|-------------------|
| Sim-5G  | metaSPAdes | CONCOCT                 | 29s          | 172 MB            |
|         |            | GraphBin2 with CONCOCT  | 1s           | 35 MB             |
|         |            | MaxBin2                 | 12s          | 2,389 MB          |
|         |            | GraphBin2 with MaxBin2  | 1s           | 36 MB             |
|         |            | SolidBin                | 3s           | 155 MB            |
|         |            | GraphBin2 with SolidBin | 1s           | 36 MB             |
|         | SGA        | CONCOCT                 | 20s          | 169 MB            |
|         |            | GraphBin2 with CONCOCT  | 3m 58s       | 127 MB            |
|         |            | MaxBin2                 | 15s          | 394 MB            |
|         |            | GraphBin2 with MaxBin2  | 3m 12s       | 124 MB            |
|         |            | SolidBin                | 3m 1s        | 794 MB            |
|         |            | GraphBin2 with SolidBin | 3m 54s       | 124 MB            |
| Sim-10G | metaSPAdes | CONCOCT                 | 25s          | 175 MB            |
|         |            | GraphBin2 with CONCOCT  | 2s           | 40 MB             |
|         |            | MaxBin2                 | 20s          | 2,859 MB          |
|         |            | GraphBin2 with MaxBin2  | 2s           | 41 MB             |
|         |            | SolidBin                | 3s           | 164 MB            |
|         |            | GraphBin2 with SolidBin | 2s           | 41 MB             |
|         | SGA        | CONCOCT                 | 14s          | 204 MB            |
|         |            | GraphBin2 with CONCOCT  | 4m 33s       | 101 MB            |
|         |            | MaxBin2                 | 28s          | 285 MB            |
|         |            | GraphBin2 with MaxBin2  | 5m           | 101 MB            |
|         |            | SolidBin                | 8m 25s       | 1,423 MB          |
|         |            | GraphBin2 with SolidBin | 5m 2s        | 101 MB            |
| Sim-20G | metaSPAdes | CONCOCT                 | 41s          | 193 MB            |
|         |            | GraphBin2 with CONCOCT  | 3s           | 44 MB             |
|         |            | MaxBin2                 | 32s          | 2,854 MB          |
|         |            | GraphBin2 with MaxBin2  | 3s           | 44 MB             |
|         |            | SolidBin                | 4s           | 193 MB            |
|         |            | GraphBin2 with SolidBin | 5s           | 45 MB             |
|         | SGA        | CONCOCT                 | 25s          | 211 MB            |
|         |            | GraphBin2 with CONCOCT  | 28m 45s      | 194 MB            |
|         |            | MaxBin2                 | 49s          | 364 MB            |
|         |            | GraphBin2 with MaxBin2  | 29m 40s      | 192 MB            |
|         |            | SolidBin                | 18m 47s      | 2,064 MB          |
|         |            | GraphBin2 with SolidBin | 29m 54s      | 193 MB            |
| 50G-SR  | metaSPAdes | CONCOCT                 | 1m 35s       | 237 MB            |
|         |            | GraphBin2 with CONCOCT  | 19s          | 75 MB             |
|         |            | MaxBin2                 | 1m 33 s      | 3,978 MB          |
|         |            | GraphBin2 with MaxBin2  | 33s          | 77 MB             |
|         |            | SolidBin                | 13s          | 500 MB            |
|         |            | GraphBin2 with SolidBin | 21s          | 75 MB             |

Supplementary Table 5: Running times (wall time) and peak memory usage for binning using each tool for the simulated short-read datasets. *s* denotes seconds, *m* denotes minutes and *MB* denotes megabytes.

| Dataset    | Assembly   | Tool                     | Running time | Peak memory usage |
|------------|------------|--------------------------|--------------|-------------------|
| Sharon1    | metaSPAdes | CONCOCT                  | 12s          | 166 MB            |
|            |            | GraphBin2 with CONCOCT   | 4s           | 45 MB             |
|            |            | MaxBin2                  | 9s           | 1,389 MB          |
|            |            | GraphBin2 with MaxBin2   | 5s           | 45 MB             |
|            |            | SolidBin                 | 6s           | 290 MB            |
|            |            | GraphBin2 with SolidBin  | 5s           | 45 MB             |
|            | SGA        | CONCOCT                  | 20s          | 172 MB            |
|            |            | GraphBin2 with CONCOCT   | 3s           | 33 MB             |
|            |            | MaxBin2                  | 12s          | 203 MB            |
|            |            | GraphBin2 with MaxBin2   | 3s           | 33 MB             |
|            |            | SolidBin                 | 15s          | 654 MB            |
|            |            | GraphBin2 with SolidBin  | 3s           | 33 MB             |
| SharonAll  | metaSPAdes | CONCOCT                  | 1m 8s        | 189 MB            |
|            |            | GraphBin2 with CONCOCT   | 9m 54s       | 137 MB            |
|            |            | MaxBin2                  | 30s          | 1,378 MB          |
|            |            | GraphBin2 with MaxBin2   | 10m 50s      | 163 MB            |
|            |            | SolidBin                 | 2m 7s        | 1,416 MB          |
|            |            | GraphBin2 with SolidBin  | 11m 12s      | 163 MB            |
|            | SGA        | CONCOCT                  | 1m 46s       | 201 MB            |
|            |            | GraphBin2 with CONCOCT   | 1m 13s       | 50 MB             |
|            |            | MaxBin2                  | 28s          | 241 MB            |
|            |            | GraphBin2 with MaxBin2   | 1m 21s       | 50 MB             |
|            |            | SolidBin                 | 2m 51s       | 2,612 MB          |
|            |            | GraphBin2 with SolidBin  | 1m 15s       | 50 MB             |
| Lake Water | metaSPAdes | CONCOCT                  | 22m 2s       | 807 MB            |
|            |            | GraphBin2 with CONCOCT   | 58m 42s      | 855 MB            |
|            |            | MaxBin2                  | 23m 27s      | 1,004 MB          |
|            |            | GraphBin2 with MaxBin2   | 55m 17s      | 862 MB            |
|            |            | SolidBin*                | N/A*         | N/A*              |
|            |            | GraphBin2 with SolidBin* | N/A*         | N/A*              |
| 100G-LR    | metaFlye   | CONCOCT                  | 3m 7s        | 399 MB            |
|            |            | GraphBin2 with CONCOCT   | 9s           | 54 MB             |
|            |            | MaxBin2                  | 4m 8s        | 3,976 MB          |
|            |            | GraphBin2 with MaxBin2   | 4s           | 57 MB             |
|            |            | SolidBin                 | 14m 59s      | 4,840 MB          |
|            |            | GraphBin2 with SolidBin  | 4s           | 57 MB             |

Supplementary Table 6: Running times (wall time) and peak memory usage for binning using each tool for the remaining real and long-read datasets. *s* denotes seconds, *m* denotes minutes and *MB* denotes megabytes.

\* SolidBin [9] could not be run on the Lake Water dataset due to insufficient memory.

## References

- [1] Johannes Alneberg, Brynjar Smári Bjarnason, Ino de Bruijn, Melanie Schirmer, Joshua Quick, Umer Z. Ijaz, Leo Lahti, Nicholas J. Loman, Anders F. Andersson, and Christopher Quince. Binning metagenomic contigs by coverage and composition. *Nature Methods*, 11:1144–1146, Sep 2014.
- [2] Hadrien Gourel, Oskar Karlsson-Lindsjö, Juliette Hayer, and Erik Bongcam-Rudloff. Simulating Illumina metagenomic data with InSilicoSeq. *Bioinformatics*, 35(3):521–522, 07 2018.
- [3] Mikhail Kolmogorov, Derek M. Bickhart, Bahar Behsaz, Alexey Gurevich, Mikhail Rayko, Sung Bong Shin, Kristen Kuhn, Jeffrey Yuan, Evgeny Polevikov, Timothy P. L. Smith, and Pavel A. Pevzner. metaflye: scalable long-read metagenome assembly using repeat graphs. *Nature Methods*, 17(11):1103–1110, Nov 2020.
- [4] Vijini Mallawaarachchi, Anuradha Wickramarachchi, and Yu Lin. Graph-Bin: Refined binning of metagenomic contigs using assembly graphs. *Bioinformatics*, 03 2020. btaa180.
- [5] Maliheh Mehrshad, Michaela M. Salcher, Yusuke Okazaki, Shin-ichi Nakano, Karel Šimek, Adrian-Stefan Andrei, and Rohit Ghai. Hidden in plain sight—highly abundant and diverse planktonic freshwater chloroflexi. *Microbiome*, 6(1):176, Oct 2018.
- [6] Sergey Nurk, Dmitry Meleshko, Anton Korobeynikov, and Pavel A. Pevzner. metaSPAdes: a new versatile metagenomic assembler. *Genome Research*, 27(5):824–834, 2017.
- [7] Itai Sharon, Michael J. Morowitz, Brian C. Thomas, Elizabeth K. Costello, David A. Relman, and Jillian F. Banfield. Time series community genomics analysis reveals rapid shifts in bacterial species, strains, and phage during infant gut colonization. *Genome Research*, 23(1):111–120, 2013.
- [8] Jared T. Simpson and Richard Durbin. Efficient de novo assembly of large genomes using compressed data structures. *Genome Research*, 22(3):549–556, 2012.
- [9] Ziyue Wang, Zhengyang Wang, Yang Young Lu, Fengzhu Sun, and Shan-feng Zhu. SolidBin: improving metagenome binning with semi-supervised normalized cut. *Bioinformatics*, 35(21):4229–4238, 04 2019.
- [10] Anuradha Wickramarachchi, Vijini Mallawaarachchi, Vaibhav Rajan, and Yu Lin. MetaBCC-LR: metagenomics binning by coverage and composition for long reads. *Bioinformatics*, 36(Supplement\_1):i3–i11, 07 2020.
- [11] Yu-Wei Wu, Blake A. Simmons, and Steven W. Singer. MaxBin 2.0: an automated binning algorithm to recover genomes from multiple metagenomic datasets. *Bioinformatics*, 32(4):605–607, Oct 2015.
